# Supplementary material for: Differences in facial expressions during positive anticipation and frustration in dogs awaiting a reward
Source: PubMed Central journal article supplement (PMC6917793; doi:10.1038/s41598-019-55714-6), 2019-12-17
Supplement: 41598_2019_55714_MOESM1_ESM.pdf [file 41598_2019_55714_MOESM1_ESM.pdf]

# Differences in facial expressions during positive anticipation and frustration in dogs awaiting a reward

**Annika Bremhorst<sup>1,2,3,\*</sup>, Nicole A. Sutter<sup>1</sup>, Hanno Würbel<sup>1</sup>, Daniel S. Mills<sup>3</sup>, and Stefanie Riemer<sup>1</sup>**

<sup>1</sup> Division of Animal Welfare, DCR-VPHI, Vetsuisse Faculty, University of Bern, 3012 Bern, Switzerland

<sup>2</sup> Graduate School for Cellular and Biomedical Sciences (GCB), University of Bern, 3012 Bern, Switzerland

<sup>3</sup> School of Life Sciences, University of Lincoln, Lincoln LN6 7DL, United Kingdom

\* [annika@bremhorst.de](mailto:annika@bremhorst.de)

## Supplementary information:

**Supplementary Table 1.** Results of the intercoder reliability assessment.

| <b>DogsFACS variable</b>                       | <b>Cohen's Kappa</b> |
|------------------------------------------------|----------------------|
| Inner brow raiser (AU101)                      | 0.75                 |
| Blink (AU145)                                  | 0.8                  |
| Nose wrinkler and upper lip raiser (AU109+110) | 0.5                  |
| Upper lip raiser (AU110)                       | 0.19                 |
| Lip corner puller (AU12)                       | 1                    |
| Lower lip depressor (AU116)                    | 1                    |
| Lips part (AU25)                               | 1                    |
| Jaw drop (AU26)                                | 0.9                  |
| Tongue show (AD19)                             | 1                    |
| Nose lick (AD137)                              | 1                    |
| Ears forward (EAD101)                          | 0.52                 |
| Ears adductor (EAD102)                         | 0.78                 |
| Ears flattener (EAD103)                        | 0.92                 |
| Panting (AD126)                                | 1                    |
